# Supplementary material
Source: Springer Nature journal article supplement (https://www.springermedizin.de/resource/supplementary/13014_2014_1105_MOESM1_ESM.pdf/9634910)

First course

CDDP Day 1 and 15

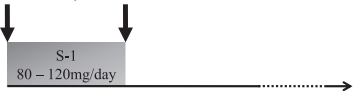

Second course

CDDP Day 1, 15 and 29

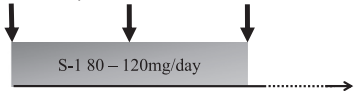

Radiation 2Gy/Fr, total 40Gy

Supplement: MOESM1 [file 9634910]
